# Supplementary material
Source: ML conference proceedings conference paper supplement (https://openreview.net/forum?id=2jCBOYTRvO)
Supplement: supplementary_material [file attachment]

---

# Supplementary Materials of Explaining Chest X-ray Pathology Models using Textual Concepts

---

Anonymous Author(s)  
Affiliation  
Address  
email

Table S1: List of primary and secondary features annotated by radiologists for each pathology in CheXplaining in Style (1)

| Pathology        | Type      | Features                            |
|------------------|-----------|-------------------------------------|
| Cardiomegaly     | Primary   | Increased cardiothoracic ratio      |
|                  | Secondary | Reduced lung tissue opacity         |
|                  |           | Pleural Effusion                    |
|                  |           | Pacemaker                           |
| Pleural Effusion | Primary   | Older patients                      |
|                  |           | Obstruction of the pleural recessus |
|                  | Secondary | Opaque lower lungs                  |
|                  |           | Increased cardiac diameter          |
| Atelectasis      | Primary   | Fluid overload                      |
|                  |           | Pneumonia                           |
|                  | Secondary | Mediastinal shift                   |
|                  |           | Wide barrel-like thorax             |
|                  | Primary   | Pleural Effusion                    |
|                  |           | Infiltration                        |
|                  | Secondary | Older patients                      |

1 **Example concepts generated by prompting ChatGPT(2)**

2 **Prompt:** What visual attributes are seen in cardiomegaly chest xray?

3

4 **Response:**

- 5 Cardiac silhouette enlargement
- 6 Increased cardiothoracic ratio
- 7 Prominent pulmonary vessels
- 8 Pleural effusion
- 9 Signs of heart failure such as pulmonary edema

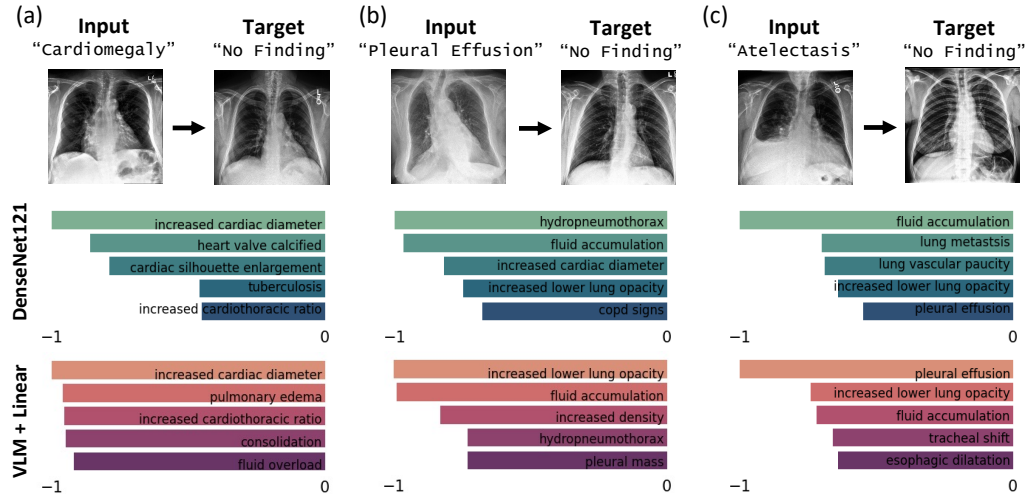

Fig. S1: **Reverse conceptual counterfactual generated by CoCoX.** The input image into the model is shown under the heading Input ("Pathology"). The target image presented under Target ("No Finding") is a representative image labeled negative for any pathologies. The concept importance scores for the top 5 concepts are visualized with blue-green for the DenseNet-121 model and orange-purple for VLM + Linear. These concepts had the most impact when subtracted from the input image embedding to change from pathology finding to no finding.

## References

- [1] Atad, M., Dmytrenko, V., Li, Y., Zhang, X., Keicher, M., Kirschke, J., Wiestler, B., Khakzar, A., Navab, N.: Chexplaining in style: Counterfactual explanations for chest x-rays using stylegan. arXiv preprint arXiv:2207.07553 (2022)
- [2] OpenAI: Chatgpt 3.5, <https://chat.openai.com> [Accessed: February 2024]
